# Supplementary material
Source: PubMed Central journal article supplement (PMC3651766)

Supplemental Figure 1

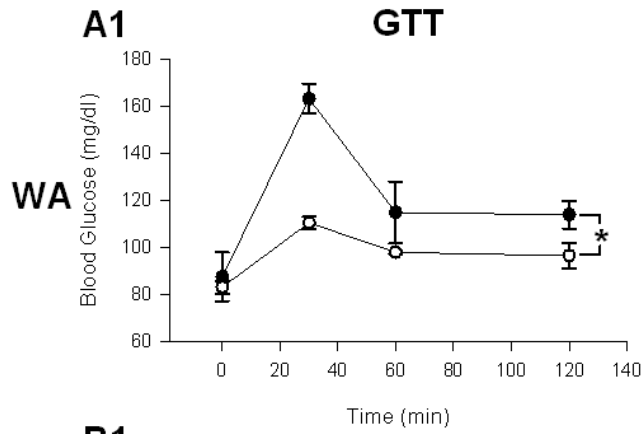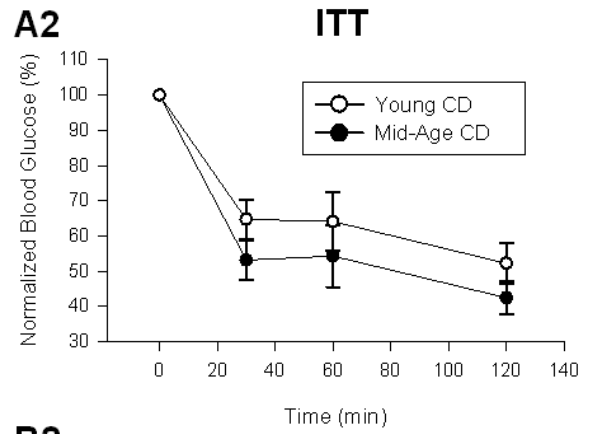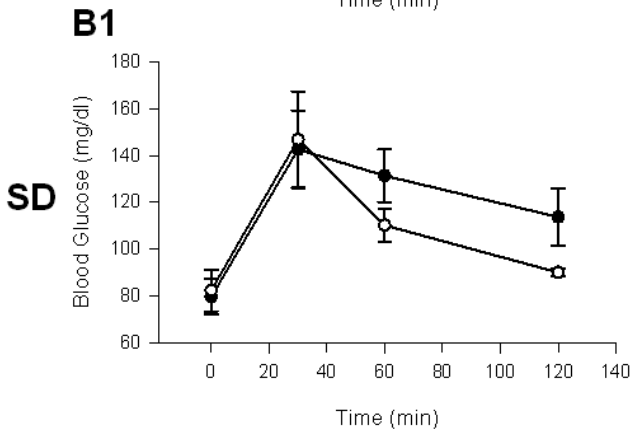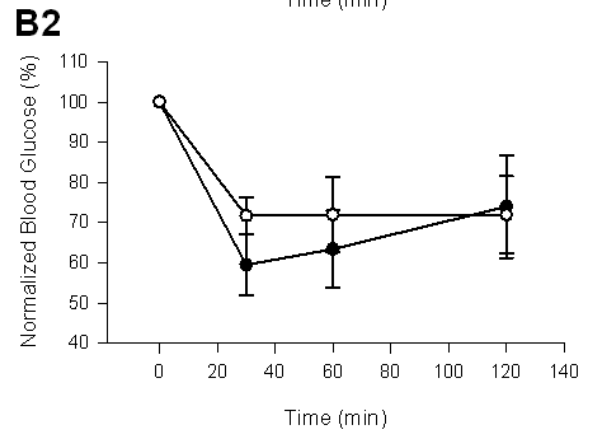

Supplement: NIHMS451537-supplement-01.pdf [file NIHMS451537-supplement-01.pdf]
